# Supplementary material for: Polychlorinated biphenyl (PCB) and dioxin concentrations in residential dust of pregnant women
Source: Royal Society of Chemistry journal article supplement (doi:10.1039/c4em00383g), 2014-01-01
Supplement: c4em00383g1.pdf [file c4em00383g1.pdf]

Supplementary Data

Table S1. Questionnaire Variables

| Variable Label/Details                                  |
|---------------------------------------------------------|
| Age in Years                                            |
| Area by category                                        |
| Place of residence (Urban/Rural/Outback etc)            |
| Household Income <\$80,000 or ≥\$80,000                 |
| Ever Smoked                                             |
| Smoking around time of pregnancy                        |
| Amounted smoked                                         |
| Visitors smoking at home within last 6 months           |
| Where does smoking occur at property                    |
| How often does someone smoke at property                |
| First Pregnancy                                         |
| Type of Home                                            |
| Approximate age of home                                 |
| Main Building Material of Home                          |
| Close to industry (Specify type of industry)            |
| Number of televisions in home                           |
| Number of Computers in home                             |
| Main Cooking Fuel                                       |
| Main Heating Source                                     |
| Renovations on home in past year                        |
| Categorised Distance to Highway                         |
| Use of Pesticides in home                               |
| White Ant/Termite Treatment at property in last 2 years |

Table S2. Detection Limits for selected PCB and Dioxin congeners

| <b>Compound</b>                      | <b>LOD (pg/g)</b> |
|--------------------------------------|-------------------|
| <i>Non-ortho substituted PCB's</i>   |                   |
| TePCB77                              | <1.5              |
| TePCB81                              | <1                |
| PePCB126                             | <1                |
| HxPCB169                             | <0.5              |
| <i>Mono-ortho substituted PCB's</i>  |                   |
| PePCB105                             | *                 |
| PePCB114                             | *                 |
| PePCB118                             | <35               |
| PePCB123                             | <1                |
| HxPCB156                             | <5                |
| HxPCB157                             | <1                |
| HxPCB167                             | <1                |
| HxPCB189                             | <0.3              |
| <i>Chlorinated dibenzo-p-dioxins</i> |                   |
| 2,3,7,8-TCDD                         | <0.2              |
| 1,2,3,7,8-PeCDD                      | <0.5              |
| 1,2,3,4,7,8-HxCDD                    | <0.5              |
| 1,2,3,6,7,8-HxCDD                    | <1                |
| 1,2,3,7,8,9-HxCDD                    | <1.5              |
| 1,2,3,4,6,7,8-HpCDD                  | <10               |
| OCDD                                 | <20               |
| <i>Chlorinated dibenzofurans</i>     |                   |
| 2,3,7,8-TCDF                         | <2                |
| 1,2,3,7,8-PeCDF                      | <1                |
| 2,3,4,7,8-PeCDF                      | <3                |
| 1,2,3,4,7,8-HxCDF                    | <3                |
| 1,2,3,6,7,8-HxCDF                    | <4                |
| 1,2,3,7,8,9-HxCDF                    | <0.3              |
| 2,3,4,6,7,8-HxCDF                    | <3                |
| 1,2,3,4,6,7,8-HpCDF                  | <20               |
| 1,2,3,4,7,8,9-HpCDF                  | <4                |
| OCDF                                 | <5                |

\*No detection limit determined

Table S3. Linear Regression analysis on total dust and dioxin concentrations (n=30).

| Pollutant      | Model       | Standardised $\beta$ coefficient | 95% Confidence Interval | t     | Sig   | Adj R <sup>2</sup> |
|----------------|-------------|----------------------------------|-------------------------|-------|-------|--------------------|
| Ln Total PCBs  | Age of Home | 0.795                            | 0.179-1.410             | 2.647 | 0.013 | 0.177              |
| Ln Total TCDF  | Age of Home | 0.882                            | 0.198-1,565             | 2.647 | 0.013 | 0.177              |
| Ln Total TCDD  | Age of Home | 0.576                            | -0.063-1.216            | 1.850 | 0.075 | 0.113              |
| LnTotal HpTCDD | Age of Home | 0.940                            | 0.275-1.604             | 2.902 | 0.007 | 0.210              |
| LnTotal HxCDF  | Age of Home | 0.772                            | 0.021-1.523             | 2.110 | 0.044 | 0.110              |
